# Supplementary material
Source: MDPI journal article supplement (https://www.mdpi.com/2071-1050/14/9/5040)
Supplement: s1 [file s1]

## Supplementary material

### *Studying waste separation behaviors and environmental impacts toward sustainable solid waste management: A case study of Bang Chalong Housing, Samut Prakan, Thailand*

Pavinee Pongpunpurt<sup>1</sup>, Pakornkeat Muensitthiroj<sup>1</sup>, Pat Pinitjitsamut<sup>2</sup>, Pisut Painmanakul<sup>1,4,5</sup>, Nattawin Chawaloephonsiya<sup>3,4,5</sup>, and Thaksina Poyai<sup>1\*</sup>

<sup>1</sup> Department of Environmental Engineering, Faculty of Engineering, Chulalongkorn University, Bangkok 10330, Thailand; pavinee.kimchi@gmail.com, pakornkeat.mue@gmail.com

<sup>2</sup> School of Environment and Society, Department of Transdisciplinary Science and Engineering, Global Engineering for Development, Environment and Society, Tokyo Institute of Technology; patpnjt@gmail.com

<sup>3</sup> Industrial Liaison Program (ILP), Faculty of Engineering, Chulalongkorn University, Bangkok 10330, Thailand; nattawin\_ch@hotmail.com

<sup>4</sup> Research Unit on Technology for Oil Spill and Contamination Management, Chulalongkorn University, Bangkok 10330, Thailand; pisut.p@chula.ac.th

<sup>5</sup> Research Program on Development of Technology and Management Guideline for Green Community, Center of Excellence on Hazardous Substance Management (HSM), Bangkok 10330, Thailand

\*Corresponding author: Thaksina.P@chula.ac.th

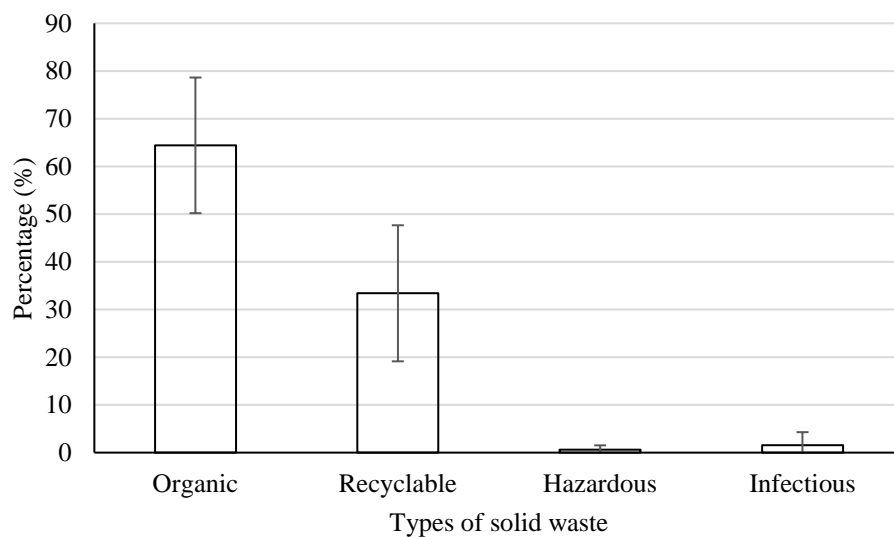

**Figure S1.** Municipal solid waste composition

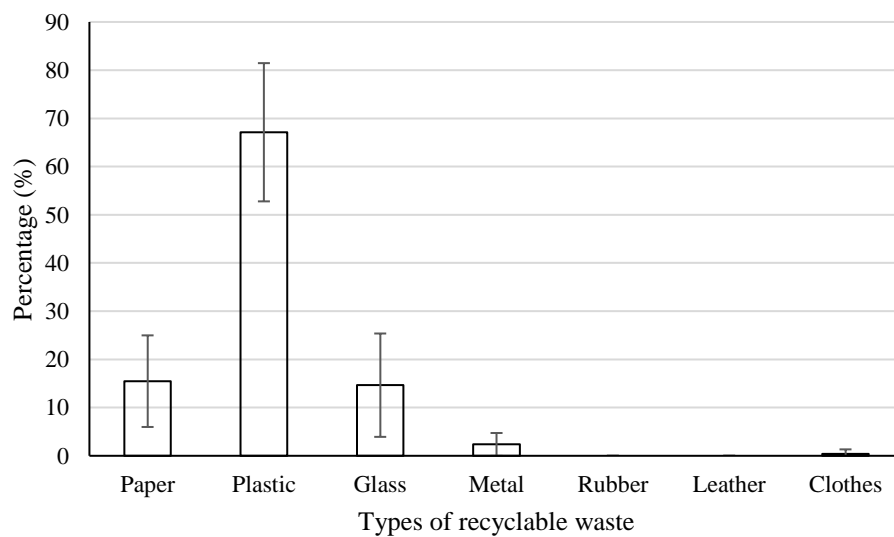

**Figure S2.** Recyclable waste composition

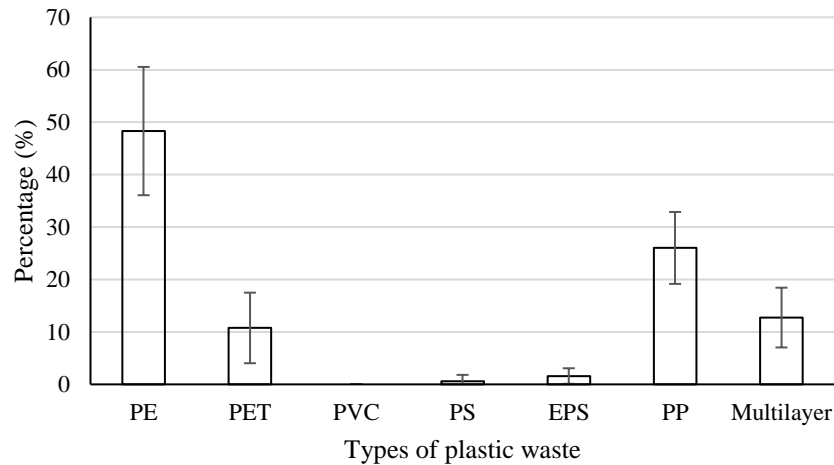

**Figure S3.** Plastic waste composition

**Table S1.** Effects of gender on waste separation behavior

| Observed variable | Gender       |       |           |      |      |           |      |      |
|-------------------|--------------|-------|-----------|------|------|-----------|------|------|
|                   | Mann-Whitney |       | Male      |      |      | Female    |      |      |
|                   | U            | P     | Mean Rank | Mean | SD   | Mean Rank | Mean | SD   |
| BE1               | 12050.0      | 0.536 | 164.40    | 3.98 | 0.85 | 158.60    | 3.96 | 0.78 |
| BE2               | 12431.5      | 0.924 | 161.53    | 3.91 | 0.89 | 160.63    | 3.92 | 0.82 |
| BE3               | 11921.0      | 0.465 | 156.63    | 2.92 | 1.21 | 164.09    | 3.01 | 1.27 |
| BE4               | 11544.5      | 0.228 | 153.80    | 4.36 | 1.31 | 166.09    | 4.51 | 1.34 |

**Table S2.** Effects of age on waste separation behavior

| Observed variable | Age       |           |           |           | Kruskal-Wallis |       | Post hoc       |
|-------------------|-----------|-----------|-----------|-----------|----------------|-------|----------------|
|                   | 18–30     | 31–45     | 46–60     | Above 60  | $\lambda^2$    | p     | Interpretation |
|                   | Mean Rank | Mean Rank | Mean Rank | Mean Rank |                |       |                |
| BE1               | 167.78    | 157.18    | 157.32    | 181.10    | 2.362          | 0.501 | -              |
| BE2               | 163.03    | 160.06    | 158.52    | 171.16    | 0.499          | 0.919 | -              |
| BE3               | 157.92    | 152.48    | 178.55    | 149.16    | 5.425          | 0.143 | -              |
| BE4               | 151.76    | 157.93    | 171.57    | 159.30    | 2.107          | 0.551 | -              |

**Table S3.** Effects of education on waste separation behavior

| Observed variable | Education         |             |                   |                          | Kruskal-Wallis |       | Post hoc       |
|-------------------|-------------------|-------------|-------------------|--------------------------|----------------|-------|----------------|
|                   | Below high school | High school | Bachelor's degree | Master's degree or above | $\lambda^2$    | p     | Interpretation |
|                   | Mean Rank         | Mean Rank   | Mean Rank         | Mean Rank                |                |       |                |
| BE1               | 160.00            | 170.94      | 147.69            | 145.17                   | 4.829          | 0.185 | -              |
| BE2               | 164.71            | 165.58      | 154.15            | 143.40                   | 2.325          | 0.508 | -              |
| BE3               | 154.33            | 156.52      | 173.81            | 173.77                   | 2.719          | 0.437 | -              |
| BE4               | 154.19            | 167.65      | 152.05            | 167.87                   | 2.067          | 0.559 | -              |

**Table S4.** Effects of monthly income on waste separation behavior

| Observed variable | Kruskal-Wallis |        | Post hoc       |
|-------------------|----------------|--------|----------------|
|                   | $\lambda^2$    | p      | Interpretation |
| BE1               | 11.826         | 0.019* | (1) > (2)      |
| BE2               | 12.177         | 0.016* | (1) > (2)      |
| BE3               | 6.998          | 0.136  | -              |
| BE4               | 7.898          | 0.095  | -              |

(1) below 5,000 Baht; (2) 5,001–10,000 Baht

**Table S5.** Effects of occupation on waste separation behavior

| Observed variable | Kruskal-Wallis |       | Post hoc       |
|-------------------|----------------|-------|----------------|
|                   | $\lambda^2$    | p     | Interpretation |
| BE1               | 5.149          | 0.525 | -              |
| BE2               | 3.741          | 0.712 | -              |
| BE3               | 8.001          | 0.238 | -              |
| BE4               | 4.888          | 0.558 | -              |

**Table S6.** Effects of ownership status on waste separation behavior

| Observed variable | Ownership |            |            | Kruskal-Wallis |        | Post hoc       |
|-------------------|-----------|------------|------------|----------------|--------|----------------|
|                   | Owner (1) | Renter (2) | Tenant (3) | $\lambda^2$    | p      | Interpretation |
|                   | Mean Rank | Mean Rank  | Mean Rank  |                |        |                |
| BE1               | 163.32    | 162.41     | 153.80     | 0.675          | 0.714  | -              |
| BE2               | 161.76    | 159.86     | 160.86     | 0.031          | 0.985  | -              |
| BE3               | 168.22    | 156.80     | 150.53     | 2.147          | 0.342  | -              |
| BE4               | 169.59    | 164.94     | 136.09     | 6.885          | 0.032* | (1) > (3)      |

**Table S7.** Effects of household size on waste separation behavior

| Observed variable | Household size (people) |           |           | Kruskal-Wallis |       | Post hoc       |
|-------------------|-------------------------|-----------|-----------|----------------|-------|----------------|
|                   | 1-2                     | 3-4       | 5-6       | $\lambda^2$    | p     | Interpretation |
|                   | Mean Rank               | Mean Rank | Mean Rank |                |       |                |
| BE1               | 160.80                  | 154.49    | 195.20    | 4.038          | 0.133 | -              |
| BE2               | 163.86                  | 148.55    | 193.73    | 5.429          | 0.066 | -              |
| BE3               | 158.88                  | 159.57    | 189.50    | 2.143          | 0.343 | -              |
| BE4               | 159.31                  | 165.52    | 155.75    | 0.388          | 0.824 | -              |

**Table S8.** Measurement model before adjustment

| Latent variable | items | Cronbach's alpha | Observed variables | Loading factor |
|-----------------|-------|------------------|--------------------|----------------|
| AT              | 3     | 0.876            | AT1                | 0.886          |
|                 |       |                  | AT2                | 0.894          |
|                 |       |                  | AT3                | 0.74           |
| SN              | 7     | 0.666            | SN1                | 0.452          |
|                 |       |                  | SN2                | 0.228          |
|                 |       |                  | SN3                | 0.627          |
|                 |       |                  | SN5                | 0.616          |
|                 |       |                  | SN6                | 0.876          |
|                 |       |                  | SN7                | 0.869          |
| PBC             | 3     | 0.865            | PBC1               | 0.746          |
|                 |       |                  | PBC2               | 0.855          |
|                 |       |                  | PBC3               | 0.888          |
| SF              | 3     | 0.680            | SF1                | 0.588          |
|                 |       |                  | SF2                | 0.624          |
|                 |       |                  | SF3                | 0.723          |
| KN              | 3     | 0.910            | KN1                | 0.895          |
|                 |       |                  | KN2                | 0.913          |
|                 |       |                  | KN3                | 0.827          |
| IN              | 3     | 0.910            | IN1                | 0.848          |
|                 |       |                  | IN2                | 0.715          |
|                 |       |                  | IN3                | 0.735          |
| BE              | 3     | 0.323            | BE1                | 0.893          |
|                 |       |                  | BE2                | 0.874          |
|                 |       |                  | BE3                | -0.09          |

**Table S9.** Methods for environmental impact assessment using ecoinvent database from SimaPro 9.1.1.7

| Scenario        | Process         | Method used for environmental impact assessment                                                                                                      |
|-----------------|-----------------|------------------------------------------------------------------------------------------------------------------------------------------------------|
| S0              | Recycling       | PET (waste treatment) (GLO)  recycling of PET   APOS, U                                                                                              |
|                 |                 | PE (waste treatment) (GLO)  recycling of PE   APOS, U                                                                                                |
|                 | Landfilling     | Waste polyethylene terephthalate (GLO)  treatment of waste polyethylene terephthalate, unsanitary landfill, wet infiltration class (500mm)   APOS, U |
|                 |                 | Waste polyethylene (GLO)  treatment of waste polyethylene, unsanitary landfill, wet infiltration class (500mm)   APOS, U                             |
| S1              | Recycling       | PET (waste treatment) (GLO)  recycling of PET   APOS, U                                                                                              |
|                 |                 | PE (waste treatment) (GLO)  recycling of PE   APOS, U                                                                                                |
| S2              | Landfilling     | Waste polyethylene terephthalate (GLO)  treatment of waste polyethylene terephthalate, unsanitary landfill, wet infiltration class (500mm)   APOS, U |
|                 |                 | Waste polyethylene (GLO)  treatment of waste polyethylene, unsanitary landfill, wet infiltration class (500mm)   APOS, U                             |
| S3              | Incineration    | Waste polyethylene terephthalate (RoW)  treatment of waste polyethylene terephthalate, municipal incineration   APOS, U                              |
|                 |                 | Waste polyethylene (RoW)  treatment of waste polyethylene, municipal incineration   APOS, U                                                          |
| S4              | Waste to Energy | Waste polyethylene terephthalate (RoW)  treatment of waste polyethylene terephthalate, municipal incineration   Conseq, U                            |
|                 |                 | Waste polyethylene (RoW)  treatment of waste polyethylene, municipal incineration   Conseq, U                                                        |
| S5              | Recycling       | PET (waste treatment) (GLO)  recycling of PET   APOS, U                                                                                              |
|                 |                 | PE (waste treatment) (GLO)  recycling of PE   APOS, U                                                                                                |
|                 | Landfilling     | Waste polyethylene terephthalate (GLO)  treatment of waste polyethylene terephthalate, unsanitary landfill, wet infiltration class (500mm)   APOS, U |
|                 |                 | Waste polyethylene (GLO)  treatment of waste polyethylene, unsanitary landfill, wet infiltration class (500mm)   APOS, U                             |
| Electricity use |                 | Electricity, medium voltage (TH)  market for   APOS, U                                                                                               |

**Table S10.** The result of environmental impacts assessed by CML-IA baseline ver.3.06

| Impact category                  | Unit         | S0_Current situation | S1_All recycling | S2_All landfilling | S3_All incineration | S4_All WtE | S5_Sorting plant |
|----------------------------------|--------------|----------------------|------------------|--------------------|---------------------|------------|------------------|
| Abiotic depletion                | kg Sb eq     | -0.4600              | -3.3028          | 0.0003             | 0.0169              | -0.0187    | -2.7325          |
| Abiotic depletion (fossil fuels) | MJ           | -108231              | -2126157         | 2106               | 9126                | -553070    | -1721983         |
| Global warming (GWP100a)         | kg CO2 eq    | 2053                 | -57213           | 5972               | 98231               | 40541      | -45342           |
| Ozone layer depletion (ODP)      | kg CFC-11 eq | -0.000142            | -0.002005        | 0.000026           | 0.000079            | -0.000081  | -0.001632        |
| Human toxicity                   | kg 1,4-DB eq | 54300                | -39148           | 60316              | 119545              | 80380      | -20443           |
| Fresh water aquatic ecotoxicity  | kg 1,4-DB eq | 144599               | -21839           | 153088             | 299370              | 247042     | 11460            |
| Marine aquatic ecotoxicity       | kg 1,4-DB eq | 146314676            | -35236464        | 156241026          | 296425118           | 132661820  | 1090129          |
| Terrestrial ecotoxicity          | kg 1,4-DB eq | -2.94                | -47.54           | 1.94               | 3.18                | -166.62    | -38.60           |
| Photochemical oxidation          | kg C2H4 eq   | 0.06                 | -20.08           | 1.18               | 0.15                | -15.64     | -16.05           |
| Acidification                    | kg SO2 eq    | -12.14               | -196.32          | 1.17               | 9.60                | -393.43    | -159.43          |
| Eutrophication                   | kg PO4-- eq  | 614.52               | -30.88           | 647.25             | 8.37                | -301.59    | 98.22            |
